# Supplementary material for: Population genomic analysis of the greater amberjack (Seriola dumerili) in the Mediterranean and the Northeast Atlantic, based on SNPs, microsatellites, and mitochondrial DNA sequences
Source: Frontiers journal article supplement (doi:10.3389/frish.2024.1356313), 2024-03-07
Supplement: Data_Sheet_2.xlsx [file Data_Sheet_2.xlsx]

## Sheet: Sheet1
Sample	sdu29		sdu31		sdu34		sdu36		sdu37		sdu39		sdu40		sdu41		sdu46
CH-01	329	333	86	86	88	92	206	206	174	176	156	178	227	227	96	102	213	241
CH-02	329	329	86	86	88	92	214	214	174	174	146	166	227	227	102	102	213	245
CH-03	333	333	0	0	88	92	214	214	174	174	156	166	205	227	102	102	213	241
CH-04	313	329	86	86	92	96	212	214	174	174	156	178	219	229	96	102	213	243
CH-05	329	331	86	92	92	92	210	210	168	174	156	180	205	229	96	102	213	243
CH-06	329	331	86	92	88	100	214	214	174	280	156	156	227	227	102	106	213	213
CH-07	313	329	92	98	92	92	210	214	168	236	156	178	205	241	102	102	213	213
CH-08	331	335	86	86	92	100	210	216	174	174	166	178	227	227	96	96	213	243
CH-09	329	333	86	92	88	92	210	214	174	236	178	178	205	205	96	102	213	213
CH-10	331	333	86	86	88	92	210	214	174	278	156	178	227	227	96	102	241	245
CH-11	313	323	92	98	92	100	208	212	176	236	166	178	219	219	96	102	213	243
CH-12	313	313	86	98	92	92	206	214	174	236	156	160	205	227	102	106	213	213
CH-13	313	323	86	98	100	100	210	214	234	280	178	178	217	217	102	102	213	241
CH-14	331	331	86	92	92	92	210	212	176	236	156	156	227	227	96	102	243	243
CH-15	313	335	86	92	92	100	198	206	174	242	156	178	227	227	96	102	213	243
CH-16	313	329	86	98	88	92	214	218	168	168	156	166	227	227	96	102	243	243
CH-17	313	335	86	98	92	92	210	214	168	284	156	178	205	227	102	102	213	245
CH-18	331	333	86	92	92	100	214	214	176	270	160	160	229	249	102	128	213	213
CY-01	323	333	86	92	92	100	206	210	174	174	156	178	205	227	102	102	213	219
CY-02	313	337	86	92	92	92	206	210	168	168	156	166	205	205	96	96	213	243
CY-03	329	333	92	98	92	98	210	214	174	174	156	178	227	249	96	102	213	241
CY-04	323	335	86	86	92	100	200	214	174	176	146	160	219	221	102	128	241	241
CY-05	313	333	86	90	92	92	214	214	174	174	160	178	227	241	102	106	243	243
CY-06	329	331	88	92	92	96	206	214	174	174	156	166	227	249	96	102	213	213
CY-07	329	331	86	86	88	108	206	206	168	176	146	146	205	221	102	102	213	213
CY-08	0	0	86	92	88	108	0	0	0	0	156	156	205	205	102	102	213	241
CY-09	313	333	86	98	92	92	206	210	168	168	156	178	227	227	96	102	213	213
CY-10	331	333	86	86	92	92	206	210	168	174	178	180	205	227	96	96	213	213
CY-11	313	349	86	86	86	108	200	206	168	168	146	156	217	227	102	112	213	237
CY-12	313	329	86	92	86	96	214	214	174	174	140	156	205	249	102	102	213	241
CY-13	313	333	86	86	92	100	208	214	168	168	178	178	227	227	102	128	213	243
CY-14	313	313	84	92	88	88	206	214	168	174	166	178	205	227	96	96	243	243
CY-15	329	349	86	86	86	88	208	208	174	174	156	156	219	227	102	102	213	241
CY-16	331	333	86	92	92	92	208	210	174	176	156	178	205	227	102	112	213	241
CY-17	317	317	92	98	88	96	206	216	168	174	166	178	221	231	102	112	241	247
CY-18	313	323	86	86	86	92	208	210	174	278	160	160	205	219	96	112	213	213
CY-19	313	313	88	92	92	92	206	214	176	242	156	178	205	227	102	128	243	243
CY-20	0	0	90	92	86	98	0	0	0	0	0	0	0	0	0	0	0	0
CY-21	329	335	84	86	92	92	208	214	174	174	156	178	227	227	102	102	213	243
CY-22	313	313	92	98	88	92	212	214	176	242	156	156	205	205	102	102	225	233
CY-23	313	333	86	92	88	100	206	214	168	174	156	178	205	227	96	102	213	243
CY-24	331	333	82	86	92	92	214	230	174	176	156	166	227	227	96	102	243	243
CY-25	313	333	72	86	86	92	210	230	168	174	156	166	227	227	102	102	213	241
CY-26	313	331	86	86	88	88	210	214	174	174	156	156	205	229	102	102	213	243
CY-27	333	349	86	92	88	100	206	214	174	174	156	156	227	229	102	106	213	243
CY-28	333	337	86	92	86	92	214	214	174	174	156	178	227	249	96	102	213	243
CY-29	331	333	86	92	88	92	212	214	174	174	156	178	227	227	102	102	213	213
CY-30	331	333	86	86	92	92	208	214	168	174	178	178	205	205	102	102	213	243
CY-31	313	333	82	86	88	96	210	214	168	236	156	156	205	217	102	102	241	243
CY-32	331	333	86	86	92	92	200	214	174	174	156	178	205	227	102	112	213	245
CY-33	313	333	86	86	88	92	206	212	174	174	178	180	227	249	102	102	213	241
CY-34	323	333	86	92	86	86	206	218	176	280	156	156	205	205	96	102	213	233
CY-35	313	339	84	86	86	100	214	214	174	174	156	160	227	227	102	102	213	243
CY-36	331	331	98	98	92	100	206	214	282	284	156	178	205	227	102	102	213	241
CY-37	313	333	86	86	88	100	200	214	236	278	178	178	205	227	102	106	213	243
CY-38	333	333	84	86	96	108	210	214	168	168	156	160	227	227	102	102	241	241
CY-39	331	331	86	92	92	92	208	214	168	176	156	178	227	249	96	96	213	213
CY-40	329	331	86	92	92	92	206	210	168	174	146	156	205	227	96	102	235	243
CY-41	323	339	90	92	92	92	206	212	168	174	156	178	227	227	102	102	213	213
CY-42	313	313	86	86	92	108	210	214	176	176	156	156	217	227	96	102	213	243
CY-43	329	339	86	98	86	88	206	214	174	176	156	156	227	227	102	102	213	235
CY-44	313	333	86	86	88	100	210	214	174	242	160	178	205	227	96	102	213	213
CY-45	313	333	92	92	86	100	208	210	174	176	158	160	227	231	102	102	213	213
CY-46	313	329	86	86	92	100	208	218	168	174	146	146	217	227	96	102	243	243
CY-47	313	333	86	86	92	96	212	214	168	280	146	180	227	249	96	102	233	243
CY-48	313	333	84	92	92	92	210	214	168	174	156	178	205	249	102	102	213	235
CY-49	329	349	86	92	88	92	200	214	168	176	156	156	205	227	102	102	213	213
CY-50	329	329	86	92	86	100	206	210	168	176	156	160	227	227	96	102	243	243
CY-51	313	313	86	92	92	92	206	210	174	174	156	166	227	227	102	102	213	213
CY-52	313	329	86	98	86	92	212	214	168	174	146	156	205	227	102	102	213	213
CY-53	329	331	84	92	88	88	214	214	174	236	156	182	205	229	102	102	213	213
CY-54	313	333	92	92	92	100	210	214	174	174	156	178	227	229	102	102	243	243
CY-55	313	323	86	86	92	96	208	210	174	280	166	178	219	227	102	102	213	243
CY-56	313	333	86	86	86	92	206	214	174	176	160	178	227	227	96	102	213	243
GC-01	313	329	84	92	86	88	214	218	168	174	178	178	219	227	102	112	213	213
GC-02	313	329	84	84	86	92	212	218	174	240	176	178	205	229	102	102	213	213
GC-03	313	335	84	84	86	92	212	218	174	240	158	178	229	231	102	102	213	213
GC-04	313	331	84	84	88	94	210	218	174	270	156	158	229	231	102	102	213	241
GC-05	313	333	84	88	88	94	210	218	240	270	156	178	219	231	102	132	213	241
GC-06	313	333	84	84	86	92	206	218	174	234	156	178	229	231	102	102	213	237
GC-07	313	335	84	84	88	92	212	218	174	174	176	178	229	231	102	102	213	213
GC-08	313	313	84	92	86	88	208	214	168	240	158	178	205	229	102	102	213	213
GC-09	313	335	84	84	88	92	208	212	174	174	176	178	205	219	102	132	213	213
GC-10	313	335	84	84	86	92	208	212	174	240	158	176	205	229	102	102	213	213
GC-11	313	313	84	92	88	88	214	218	168	174	156	178	227	229	102	112	213	243
GC-12	313	313	84	92	86	88	214	218	234	240	156	178	205	229	102	102	213	243
GC-13	313	333	84	84	86	94	208	210	174	234	156	158	219	231	102	132	213	241
GC-14	313	331	84	84	86	94	206	208	234	240	156	158	219	227	132	132	213	237
GC-15	313	333	84	84	86	92	208	210	240	270	156	158	219	231	102	102	213	241
GC-16	313	329	84	88	86	92	212	218	174	240	158	176	219	231	102	102	213	213
GC-17	313	333	84	84	86	92	208	210	174	270	156	178	227	229	102	102	213	241
GC-18	313	329	84	84	86	92	208	218	174	240	178	178	205	229	102	102	213	213
GC-19	313	333	84	88	86	94	208	210	174	234	156	178	227	229	102	132	213	241
GC-20	313	331	84	84	86	92	206	208	240	270	156	158	227	229	102	132	213	237
GC-21	313	331	84	88	86	92	210	218	234	240	156	178	229	231	102	102	213	237
GC-22	313	331	84	84	88	92	208	210	234	240	156	178	229	231	102	102	213	237
GC-23	313	331	84	84	88	92	208	210	234	240	156	178	229	231	102	102	213	237
GC-24	313	313	84	92	86	88	208	214	168	174	178	178	205	229	102	102	213	213
GC-25	313	313	88	92	88	88	208	214	174	234	156	158	227	229	102	112	213	243
LA-02	331	331	92	92	92	100	210	212	176	176	156	156	227	227	96	102	213	213
LA-04	323	331	84	92	96	100	210	214	174	280	156	160	227	229	102	102	213	243
LA-05	333	333	86	86	100	100	206	214	168	176	146	178	227	227	96	102	243	243
LA-06	331	333	86	86	88	88	210	214	168	236	160	178	205	227	96	102	241	241
LA-08	313	333	86	98	92	92	210	214	174	174	178	180	227	229	102	102	213	213
LA-09	313	333	86	86	92	92	214	214	174	174	162	178	217	249	102	106	213	233
LA-10	329	331	86	86	92	92	206	206	174	176	156	178	219	227	102	102	213	213
LA-11	313	333	86	86	88	108	210	214	168	174	178	178	227	227	96	106	213	243
LA-14	313	331	86	98	86	100	210	218	234	290	156	156	227	227	96	102	243	243
LA-15	313	331	92	92	88	92	210	212	174	174	156	166	205	205	96	102	213	241
LA-16	329	329	92	92	92	92	210	214	242	278	156	178	205	229	102	102	243	243
LA-17	329	331	92	92	92	100	210	214	168	176	160	178	227	227	102	106	213	241
LA-18	313	333	84	86	88	88	208	214	174	174	156	156	205	227	102	102	213	213
LA-19	313	313	92	92	86	100	214	214	168	174	156	166	227	227	102	102	213	213
LA-20	313	331	86	86	86	86	200	210	252	252	156	156	219	227	102	102	213	233
LA-21	313	331	86	86	88	100	206	214	174	174	146	156	227	227	102	102	213	241
LA-22	313	333	92	92	86	92	214	214	174	174	156	156	205	249	102	102	213	233
LA-23	323	329	86	92	88	92	210	214	174	286	156	178	227	229	102	102	237	243
LA-24	313	333	98	98	92	100	206	214	174	174	156	178	227	229	102	128	213	243
LA-25	313	331	86	98	86	88	206	210	174	174	156	178	219	229	102	102	213	243
LA-26	333	333	86	98	92	92	206	210	176	274	156	178	227	227	96	102	213	213
LA-27	313	335	86	86	100	102	206	230	176	176	166	178	241	249	96	128	213	213
LA-28	313	313	86	92	92	100	210	214	174	174	156	156	227	227	102	102	213	241
LA-29	313	331	86	86	92	100	206	214	174	242	156	178	227	249	104	110	233	243
LA-30	329	329	92	92	88	92	210	214	174	236	156	178	227	231	102	102	213	235
LA-31	331	335	86	92	86	86	198	206	174	176	156	178	217	227	102	102	213	243
LA-32	313	335	86	92	92	92	210	214	174	176	156	178	217	227	102	102	213	241
LA-33	313	323	84	86	92	92	206	214	168	176	156	156	227	227	96	102	213	213
LA-34	313	313	86	92	88	92	206	210	0	0	156	160	217	227	102	102	213	213
LA-36	313	329	86	88	88	92	206	210	174	174	178	178	227	249	102	102	213	241
LA-37	313	335	86	92	92	92	214	218	168	174	160	160	227	227	102	128	243	243
LA-38	313	329	86	92	92	92	206	214	174	176	156	156	227	227	102	102	213	241
LA-39	313	333	86	86	88	92	208	214	168	174	156	156	219	227	96	102	213	213
LA-40	313	333	86	98	86	88	206	212	174	174	156	178	227	229	96	102	213	243
LA-41	313	331	86	86	96	96	210	210	290	290	166	178	205	249	102	102	213	241
LA-42	329	329	86	86	92	100	212	214	168	174	156	178	227	227	102	106	213	213
LA-43	331	333	92	92	92	92	206	206	168	176	156	156	219	227	102	104	243	243
LA-44	331	331	86	92	86	92	208	214	168	174	156	166	227	249	102	102	213	241
LA-45	329	329	86	88	86	86	200	210	174	174	166	178	227	227	96	102	213	243
LA-46	329	335	86	86	88	92	210	214	174	174	146	178	227	227	96	102	213	213
LA-47	313	331	84	86	100	100	206	214	176	278	156	156	227	249	96	96	213	241
LA-48	313	331	92	92	88	92	210	212	174	174	156	178	217	219	102	102	213	243
LA-49	313	331	86	86	88	92	210	214	176	176	156	178	227	227	102	102	243	243
LA-50	331	335	88	92	92	100	208	208	174	270	160	178	227	227	102	102	213	213
LA-51	313	335	84	86	88	92	198	210	174	176	156	160	205	227	96	96	213	213
TU-01	333	333	86	86	88	100	200	214	168	174	146	178	227	227	102	102	243	243
TU-02	313	333	86	92	92	96	206	214	168	274	156	178	227	229	96	96	213	213
TU-03	313	333	86	98	88	96	214	214	174	174	156	178	227	227	96	102	213	243
TU-04	333	333	84	86	96	96	214	230	174	174	156	178	205	249	96	102	213	213
TU-05	313	313	86	86	92	92	206	210	174	174	178	178	229	229	102	102	213	243
TU-06	331	331	86	86	88	100	198	214	236	238	156	166	227	227	102	102	241	247
TU-07	333	333	86	98	86	88	206	214	174	176	146	156	219	227	102	128	213	243
TU-08	313	339	86	88	88	92	200	214	168	174	160	178	205	227	102	102	213	241
TU-09	331	335	86	92	88	92	200	208	168	176	178	178	217	227	102	112	213	213
TU-10	331	335	86	86	92	96	208	214	174	174	156	178	227	227	96	102	213	243
TU-11	331	335	86	86	86	88	206	214	176	176	156	178	217	227	102	106	213	213
TU-12	333	333	86	92	88	100	206	210	174	174	166	178	227	227	102	102	213	241
TU-13	313	333	86	86	92	92	214	214	168	174	160	166	227	227	102	102	213	241
TU-14	331	339	86	86	86	86	214	218	174	174	156	166	217	229	96	102	243	243
TU-15	313	333	84	92	92	100	210	214	174	174	156	178	227	249	96	102	213	241
TU-16	313	333	84	98	88	96	206	216	174	174	156	166	233	233	102	102	213	235
TU-17	331	331	92	98	92	100	206	210	174	176	158	178	227	227	102	102	213	219
NTE-23	313	333	86	88	88	88	206	212	174	278	156	156	221	229	102	102	235	245
NTE-24	313	333	84	86	88	100	208	210	174	176	156	156	205	227	102	112	213	243
NTE-25	329	335	84	86	92	92	206	210	266	274	156	178	227	231	102	102	243	243
NTE-26	313	335	86	86	88	96	210	214	168	174	156	178	205	227	96	102	213	243
NTE-27	335	335	84	86	92	120	206	206	174	278	156	166	227	229	96	102	213	243
NTE-28	313	333	84	86	88	92	208	212	174	258	178	178	219	227	96	102	241	241
NTE-29	313	313	86	98	88	100	206	210	174	174	156	156	205	227	102	112	213	247
NTE-30	335	337	84	92	88	92	214	214	174	174	156	156	219	219	102	102	213	243
NTE-31	313	333	86	86	88	88	210	212	168	174	156	156	219	227	96	96	233	245
NTE-32	333	335	86	90	92	100	206	214	176	234	156	156	205	205	96	102	237	237
NTE-33	313	333	86	88	86	92	206	210	168	174	158	166	205	233	96	102	213	243
NTE-34	331	335	84	86	88	92	208	214	174	174	156	156	205	227	102	106	229	237
NTE-35	331	331	86	88	88	96	208	214	174	270	140	156	205	231	102	106	213	247
TE-01	329	335	84	86	92	100	206	210	174	234	156	160	227	229	102	132	213	237
TE-02	329	333	92	98	88	88	214	214	174	174	156	178	227	229	96	106	213	243
TE-03	331	339	84	86	92	100	210	212	174	174	156	156	205	229	102	112	213	247
TE-04	313	313	86	92	92	100	210	216	174	174	156	156	205	229	102	102	237	237
TE-05	313	333	84	84	92	100	206	208	174	174	156	178	205	245	102	102	213	219
TE-06	313	333	84	98	92	92	208	214	174	258	166	166	229	231	102	106	213	237
TE-07	333	333	84	86	96	100	210	210	174	176	156	178	227	249	96	112	237	241
TE-08	313	335	84	84	86	92	206	214	176	266	178	178	205	231	96	112	213	235
TE-09	313	335	88	92	92	94	200	206	258	274	160	178	205	217	96	106	213	241
TE-10	329	329	84	86	92	92	206	210	168	266	156	156	217	245	102	102	233	243
TE-11	313	313	86	86	86	92	210	212	174	176	156	156	205	205	102	106	235	243
TE-12	313	335	84	86	94	100	206	214	174	174	156	156	217	249	102	102	213	237
TE-13	329	331	84	84	92	92	200	206	174	252	156	178	219	229	102	132	213	241
TE-14	313	333	84	84	88	94	214	216	174	284	156	158	205	205	102	102	219	237
TE-15	329	335	88	92	100	100	214	216	168	174	156	156	205	229	96	102	243	243
TE-16	329	331	84	92	96	108	208	212	174	174	156	160	205	227	102	112	213	213
TE-17	333	335	92	98	86	88	214	214	176	176	156	158	205	229	102	106	213	213
TE-18	313	323	84	84	92	100	210	212	168	174	156	156	229	245	102	110	213	237
TE-19	313	335	84	84	88	92	206	214	168	258	156	156	219	227	102	102	237	243
TE-20	313	329	86	92	100	100	214	214	174	280	156	156	217	227	96	96	213	237
TE-21	313	335	84	86	94	96	210	214	234	266	156	156	227	229	106	106	213	243
TE-22	313	313	84	92	88	88	206	216	176	266	156	156	227	231	102	102	213	241
CR-01	331	333	86	86	92	92	210	210	174	286	156	156	227	227	102	106	213	213
CR-02	329	333	86	92	86	100	208	214	274	284	140	160	227	233	102	102	213	243
CR-03	313	331	86	92	92	98	206	214	174	278	146	156	227	227	102	112	233	243
CR-04	329	331	86	92	92	98	212	214	176	242	156	178	227	227	102	102	213	213
AS-01	333	333	86	86	86	92	208	210	174	174	156	178	227	227	96	102	213	243
AS-02	313	331	86	86	100	100	210	214	168	174	146	178	227	227	102	102	213	243
AS-03	313	313	86	92	86	92	210	212	174	238	156	156	205	219	102	102	213	241
AS-04	313	331	86	92	88	96	210	214	168	168	160	162	219	227	102	102	243	243
AS-05	313	329	86	92	88	92	200	206	168	242	156	166	205	229	102	102	213	245
AS-06	333	339	86	86	100	100	210	214	174	174	156	160	227	227	96	106	213	213
AS-07	313	335	92	98	92	100	208	214	174	174	156	160	219	227	102	102	213	247
AS-08	313	313	86	86	92	92	210	210	168	286	156	158	217	227	102	102	213	213
AS-09	313	335	86	92	92	100	206	208	174	174	156	156	205	227	102	102	213	243
AS-10	313	331	92	92	86	92	200	206	168	174	156	166	217	227	96	128	241	241
AS-11	331	333	86	86	92	100	210	214	174	174	166	178	205	227	102	102	213	243
AS-12	331	333	84	86	88	92	214	214	174	176	156	178	227	227	102	102	213	213
AS-13	313	323	82	86	92	100	212	214	168	176	156	178	205	227	102	102	213	243
AS-14	313	331	92	98	88	100	208	210	168	176	156	166	205	217	102	128	243	243
AS-15	313	331	86	86	88	100	214	214	174	176	178	178	227	227	96	96	213	245
AS-16	331	335	84	98	88	92	210	214	176	234	160	178	217	243	96	102	213	243
AS-17	323	333	92	92	88	92	206	214	168	174	156	178	227	227	102	106	213	237
AS-18	323	333	86	92	92	92	206	214	174	278	156	184	227	249	102	102	213	241
AS-19	333	335	86	92	88	92	206	206	174	174	156	156	227	227	96	102	243	243
AS-20	329	335	82	92	92	92	210	210	174	174	170	178	205	227	102	102	237	243
AS-21	313	331	86	86	92	100	214	214	174	278	160	178	227	227	102	102	213	241
AS-22	313	335	86	98	92	92	214	214	174	176	156	156	247	249	96	102	213	241
AS-23	333	333	86	92	92	92	208	214	174	176	156	160	205	227	102	102	213	241
AS-24	313	329	92	92	88	96	200	214	174	298	160	178	227	227	102	104	213	213
AS-25	313	329	86	86	96	100	200	208	168	174	156	160	217	227	102	102	243	243
ASK-01	331	331	86	86	88	100	206	216	174	242	156	158	205	229	102	102	213	241
ASK-02	329	333	86	92	88	92	206	210	176	176	156	178	205	229	102	104	243	243
ASK-03	313	333	86	92	86	92	212	214	174	174	156	166	217	227	96	96	213	243
ASK-04	323	333	84	92	92	100	214	214	168	234	146	156	205	227	102	102	213	213
ASK-05	329	335	86	86	86	92	210	214	174	176	156	156	205	229	102	102	243	243
ASK-06	313	333	86	92	92	100	214	214	176	286	156	178	205	243	102	106	233	241
ASK-07	329	349	86	98	92	100	210	216	174	174	160	178	243	249	96	102	213	213
ASK-08	329	333	86	86	92	92	208	210	174	176	160	178	217	227	102	106	213	213
ASK-09	333	339	86	86	88	92	210	210	168	176	178	178	227	227	96	102	213	213
ASK-10	333	335	86	92	98	100	214	214	174	174	158	184	205	227	102	102	213	241
ASK-11	329	331	86	98	88	92	206	210	168	174	146	178	227	227	102	102	243	245
ASK-12	313	313	84	86	92	92	208	230	174	176	156	178	205	229	96	96	213	243
ASK-13	333	333	86	86	86	100	214	214	174	176	160	178	227	249	96	96	213	213
ASK-14	329	331	86	92	100	100	200	230	242	252	156	160	205	227	96	102	213	237
ASK-16	333	335	86	98	88	108	210	214	174	284	140	156	219	227	102	102	213	243
ASK-17	313	333	86	98	92	100	214	214	168	280	156	156	227	227	102	102	213	213
ASK-18	313	313	86	86	92	92	206	214	168	252	178	182	217	227	102	102	213	233
ASK-19	313	333	86	92	86	92	206	214	176	242	166	178	205	229	102	112	233	233
ASK-20	331	331	86	98	92	92	210	210	168	284	156	156	227	227	102	102	213	243
ASK-21	313	323	86	92	86	88	210	214	174	274	156	178	219	229	96	96	243	243
ASK-22	313	333	86	86	88	92	200	216	174	234	156	160	217	227	102	102	213	213
ASK-24	333	333	86	98	88	92	206	208	174	174	156	156	227	227	102	102	213	243
ASK-25	313	339	86	86	86	92	210	214	174	234	146	178	205	227	96	102	235	243
ASK-26	331	331	86	86	92	96	210	212	174	174	178	178	227	227	96	102	213	245
ASK-28	313	335	86	86	88	100	214	214	174	174	146	156	205	227	102	102	213	213
ASK-30	333	335	82	84	88	100	210	214	174	236	156	156	217	227	102	102	233	243
ASK-31	313	329	86	88	92	92	214	230	174	176	178	178	205	227	96	106	225	235
ASK-32	331	335	84	86	92	92	210	214	168	266	140	156	227	227	96	102	213	243
ASK-33	313	333	86	92	92	100	200	208	174	176	156	162	205	227	102	102	213	243
